# Supplementary material for: Time-Lapse Incubation for Embryo Culture-Morphokinetics and Environmental Stability May Not Be Enough: Results from a Pilot Randomized Controlled Trial
Source: MDPI journal article supplement (doi:10.3390/jcm13061701), 2024-03-15
Supplement: s1 [file s1]

## Supplementary S1: Morphologic and Morphokinetic grading Criteria and scoring system

### Supplementary S1A: Morphologic grading Criteria for embryos from all Arms (1 to 3) of the study:

Time Points of assessment: (as per Desai 2014 as seen in Goodman 2016)

- 16 – 18 HPI
- 42 HPI (d2)
- 66 HPI (d3)
- +- 90 HPI
- 114 HPI
- +- 138 HPI

#### **Overall Evaluated morphologic parameters:**

- oocyte Polar body presence?
- 2PN post-fertilization?
- cell number (Optimal?)
- Cell size & symmetry
- percent fragmentation.
- Multinucleation
- +- Blastocyst check – Optimal parameters:
  - Stage of development: Early blastocyst, Blastocyst, Expanded, Hatched/Hatching
  - Inner Cell Mass (ICM) grade: A,B, C
  - Trophectoderm (TE) grade: A, B, C

#### **Breakdown of assessment:**

|                                   |              |                              |                           |                                   |
|-----------------------------------|--------------|------------------------------|---------------------------|-----------------------------------|
| <b>Pre-fertilization</b>          | PB presence? |                              |                           |                                   |
| <b>16 - 18 HPI</b>                | 2 PN?        |                              |                           |                                   |
| <b>42 HPI (d2)</b>                | # Cells?     | % Fragmentation?             | Multinucleation?          | Appropriate cell size / symmetry? |
| <b>66 HPI (d3)</b>                | # Cells?     | % Fragmentation?             | Multinucleation?          | Appropriate cell size / symmetry? |
| <b>+- 90 HPI (morula)</b>         | Stage?       | Inner Cell mass (ICM) grade? | Trophectoderm (TE) grade? |                                   |
| <b>114 HPI (exp blast)</b>        | Stage?       | Inner Cell mass (ICM) grade? | Trophectoderm (TE) grade? |                                   |
| <b>+- 138 HPI (hatched blast)</b> | Stage?       | Inner Cell mass (ICM) grade? | Trophectoderm (TE) grade? |                                   |

#### **Optimal Parameters:**

- Day 0 check: oocyte parameters:
  - Examination of polar body presence
- Day 1 / fertilization check:
  - 2 Pronuclei present
- Day 2 check:
  - Four cells

- Minimal fragmentation (<10%)
  - No multinucleation
  - Symmetry at 4 cells
- Day 3 check:
  - Eight cells
  - Minimal fragmentation (<10%)
  - Symmetry at 8 cells
- Blastocyst check:
  - Stage of development: Early blastocyst, Blastocyst, Expanded, Hatched/Hatching
  - Inner Cell Mass (ICM) grade:
    - A (Good): Prominent, easily discernible, with many cells that are compacted and tightly adhered together
    - B (Fair): Easily discernible, with many cells that are loosely grouped together
    - C (Poor): Difficult to discern, with few cells
  - Trophectoderm (TE):
    - A (Good): Many cells forming a cohesive epithelium
    - B (Fair): Few cells forming a loose epithelium
    - C (Poor): Very few cells
- **Embryos graded on day 3 or day 5 (predetermined) and transferred according to preferential morphological grading (if in Arm 1 or 3)**

## Supplementary S1B: Morphokinetic grading Criteria and scoring system

### Morphokinetic Criteria recorded for ALL embryos in TLI (Arm 2&3):

(t0 = time of insemination)

- |                                              |                                                                   |
|----------------------------------------------|-------------------------------------------------------------------|
| - <b>tPNf</b> : time to pronuclear fading    | - <b>tBL</b> : time to blastocyst                                 |
| - <b>t2</b> : time to 2 cells                | - <b>tEBL</b> : time to expanded blastocyst                       |
| - <b>t3</b> : time to 3 cells                | - <b>cc2</b> : duration of the 2 <sup>nd</sup> cell cycle (t3-t2) |
| - <b>t4</b> : time to 4 cells                | - <b>cc3</b> : duration of the 3 <sup>rd</sup> cell cycle (t5-t3) |
| - <b>t5</b> : time to 5 cells                | - <b>t4int</b> : interval between 4 and 5 cells (t5-t4)           |
| - <b>t8</b> : time to 8 cells                | - <b>t5-t2</b> : interval between 2 cells and 5 cells             |
| - <b>t9</b> : time to 9 cells                | - <b>s1</b> : t2-tPNf                                             |
| - <b>tMor</b> : time to morula               | - <b>s2</b> : t4-t3                                               |
| - <b>tSB</b> : time to start of blastulation | - <b>s3</b> : t8-t5                                               |

### Other qualitative Data:

- **Multinucleation (MU):**
  - more than one nuclei in a cell observed in 2–4-cell-stage embryos
  - recorded based on the number of cells affected and the number of nuclei per cell
- **Reverse Cleavage (RCLV):**
  - reabsorption of a blastomere after previous visual confirmation.
- **Direct uneven cleavage (DUC):**
  - evidence of one blastomere directly splitting to three
- **Irregular Division (ID)**
  - 1→3 Direct or rapid (>5h) cleavage from 1 to 3 cells, referred to as irregular division pattern
  - 2→5 Direct or rapid (>5h) cleavage from 1 to 3 cells, referred to as irregular division pattern

### Morphokinetic Criteria, additional grading for Embryos from Arm 2 (and Arm 3 retrospectively):

*HPI = Hours post-insemination*

- **POSITIVE points:**
  - t5 = 45.8–57.0h HPI (+1)
  - s2 = 0-0.1h (+1)
  - s3 = 1.4-7h (+1)
  - tSB < 100 HPI (+1)
- **NEGATIVE points:**
  - cc2 < 5h (-1)
  - Multinucleation (-0.5)
  - Irregular division (-0.5)

- SCORE=\_\_\_\_\_

**Embryo initially screened by morphology**

**THEN embryos with the highest morphokinetic score (MAX of 4 and MIN of -2.0) selected for transfer.**
